# Supplementary material for: Hydrogen storage efficiency of Fe doped carbon nanotubes: molecular simulation study
Source: Royal Society of Chemistry journal article supplement (doi:10.1039/d3ra08382a), 2024-01-01
Supplement: d3ra08382a1.pdf [file d3ra08382a1.pdf]

## Supplementary information

Table S1- comparison of total adsorption capacity of pristine CNT and FeCNT at selected temperatures

| P(Mpa)     | 175K   |         | 250K   |        | 298    |        |
|------------|--------|---------|--------|--------|--------|--------|
|            | CNT    | FeCNT   | CNT    | FeCNT  | CNT    | FeCNT  |
| <b>0.1</b> | 0.2597 | 0.2587  | 0.1560 | 0.1554 | 0.1560 | 0.1554 |
| <b>0.5</b> | 1.2898 | 1.2801  | 0.9287 | 0.9250 | 0.7751 | 0.7720 |
| <b>1</b>   | 2.6212 | 2.6040  | 1.8543 | 1.8417 | 1.5395 | 1.5323 |
| <b>1.2</b> | 3.1765 | 3.1635  | 2.2138 | 2.1962 | 1.8471 | 1.8412 |
| <b>1.4</b> | 3.6767 | 3.6659  | 2.5701 | 2.5506 | 2.1523 | 2.1427 |
| <b>1.6</b> | 4.1711 | 4.1460  | 2.9219 | 2.9075 | 2.4576 | 2.4402 |
| <b>1.8</b> | 4.7111 | 4.6026  | 3.3240 | 3.2929 | 2.7627 | 2.7474 |
| <b>2</b>   | 5.1955 | 5.0890  | 3.6738 | 3.6632 | 3.0640 | 3.0504 |
| <b>2.5</b> | 6.4015 | 6.3638  | 4.5530 | 4.5245 | 3.8142 | 3.8036 |
| <b>3</b>   | 7.2106 | 7.4090  | 5.4140 | 5.3457 | 4.5506 | 4.4907 |
| <b>3.5</b> | 7.7991 | 8.2632  | 6.1719 | 6.1205 | 5.2704 | 5.1889 |
| <b>4</b>   | 7.5449 | 8.7350  | 6.6404 | 6.8879 | 5.9445 | 5.8890 |
| <b>4.5</b> | 8.0780 | 9.2211  | 7.0093 | 7.6277 | 6.4111 | 6.4612 |
| <b>5</b>   | 9.0898 | 9.1235  | 7.1885 | 7.9834 | 7.0084 | 7.0238 |
| <b>10</b>  | 9.2009 | 10.0861 | 8.0688 | 9.4369 | 8.8401 | 9.1130 |
